# Supplementary material
Source: PubMed Central journal article supplement (PMC3552104)

# Sup. Fig. 1

A.

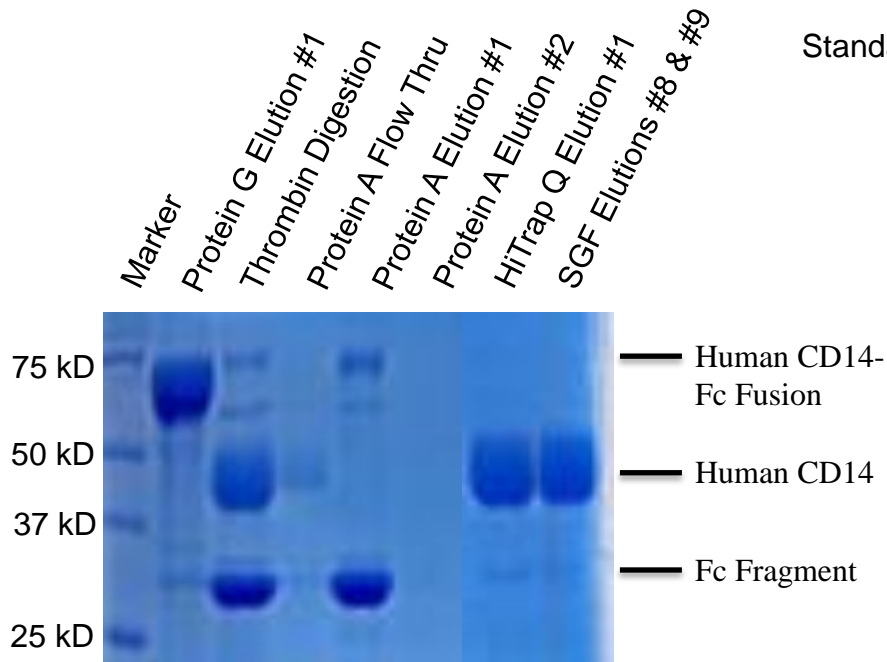

B.

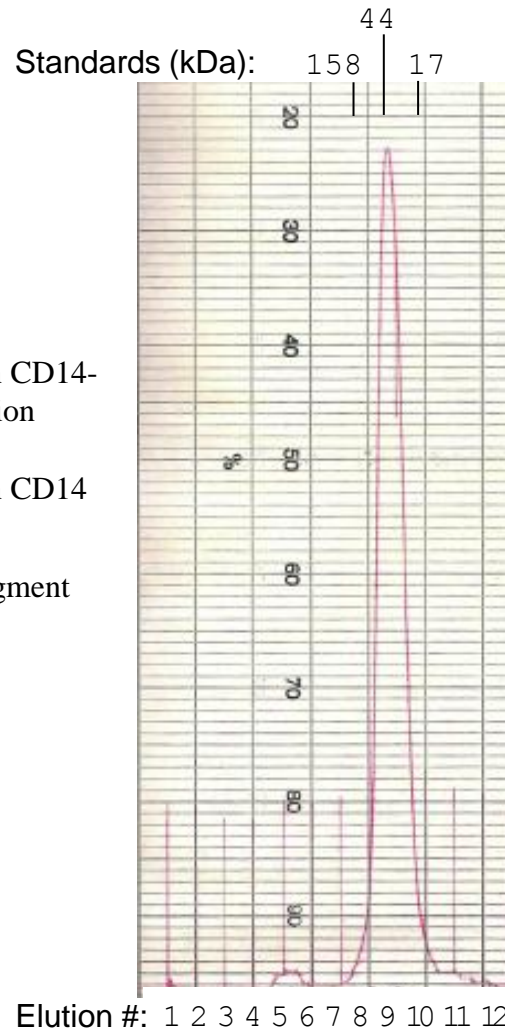

C.

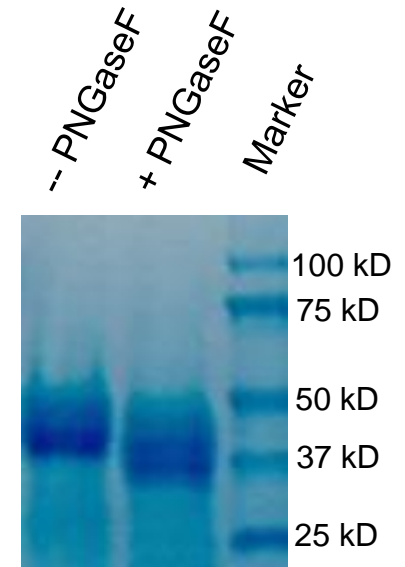

# Sup. Fig. 2

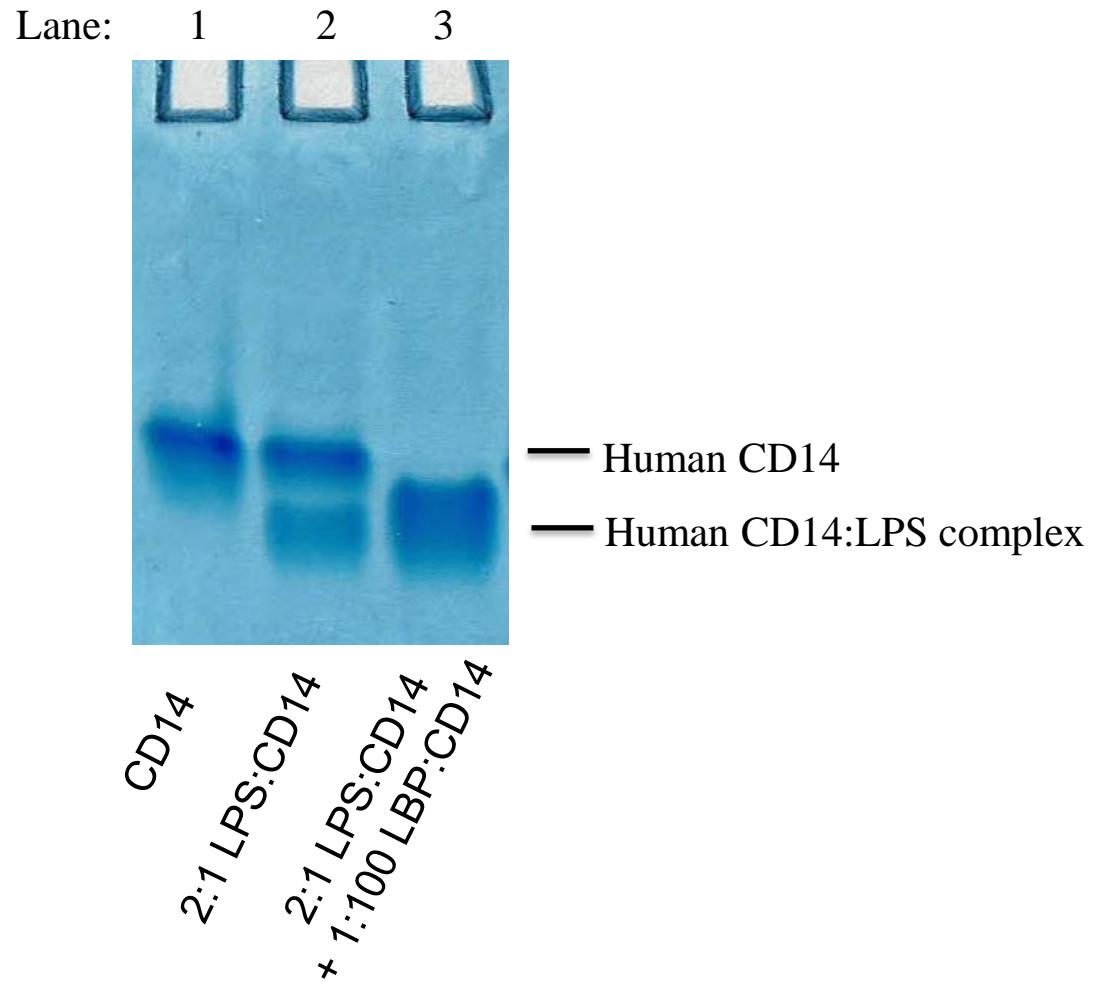

Sup. Fig. 3

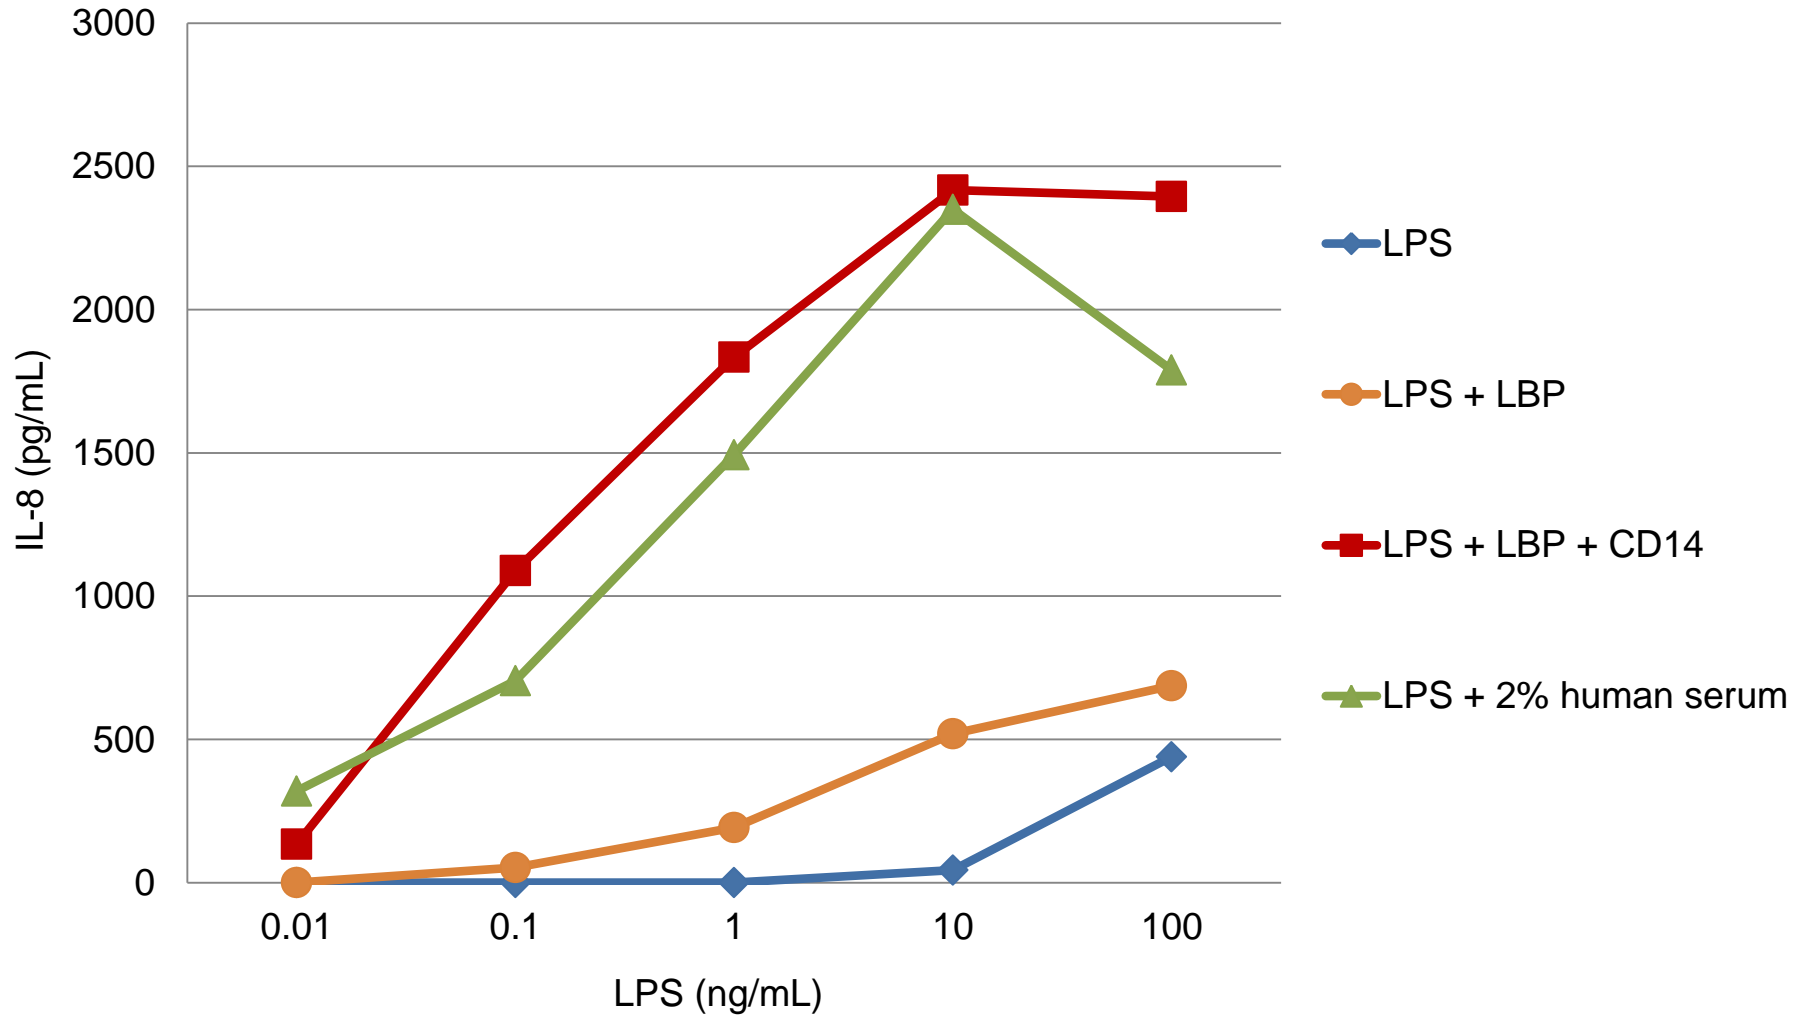

Supplement: NIHMS422719-supplement-1.pdf [file NIHMS422719-supplement-1.pdf]
